# Supplementary material
Source: publisher figshare collection journal article supplement (https://acs.figshare.com/ndownloader/files/4322593)
Supplement: Supplementary file 1 [file 4322593]

## Supporting Information - Photocatalytic H<sub>2</sub> Production from Water with Rhenium and Cobalt Complexes.

Benjamin Probst<sup>#</sup>, Miguel Guttentag<sup>#</sup>, Alexander Rodenberg<sup>§</sup>, Peter Hamm<sup>\*§</sup>, Roger Alberto<sup>\*#</sup>.

<sup>#</sup> *Institutes of Inorganic and <sup>§</sup>Physical Chemistry, University of Zürich, Winterthurerstrasse 190, CH-8057 Zürich Switzerland*

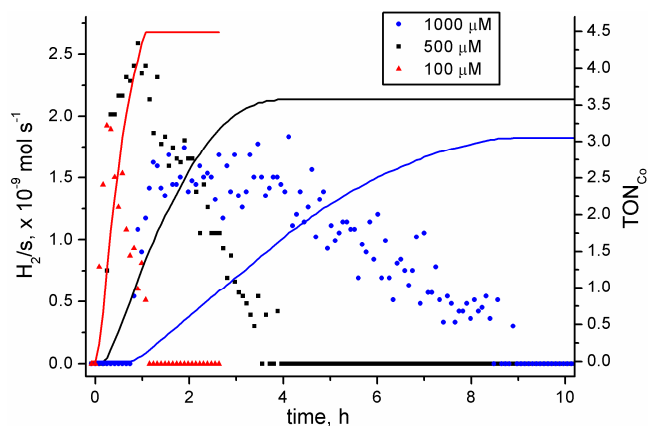

**Figure SI 1.** H<sub>2</sub> production for different concentrations of **10** (mol/s, left scale, dots; TON<sub>Co</sub>, right scale, solid lines). Conditions: 30 μM **1**, 100, 500 or 1000 μM **10**, 1 M TEOA, 0.1 M HBF<sub>4</sub>, H<sub>2</sub>O, 10 ml, 380 nm,  $q_{n,p} = 1.75 \times 10^{-7}$  einstein/s.

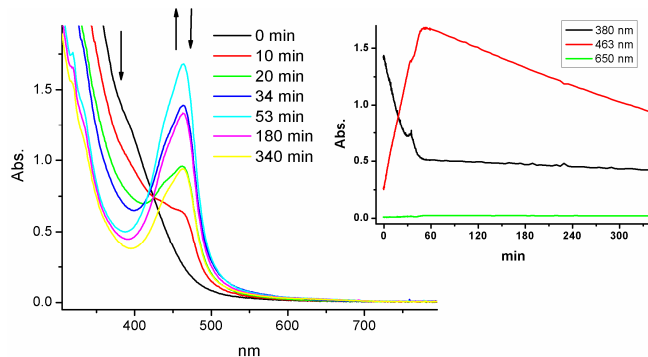

**Figure SI 2.** Typical absorption change during photolysis (30 μM **1**, 500 μM **10**, 1 M TEOA, 0.1 M HBF<sub>4</sub>, H<sub>2</sub>O, 3 ml, 380 nm,  $q_{n,p} \approx 10^{-9}$  einstein/s).

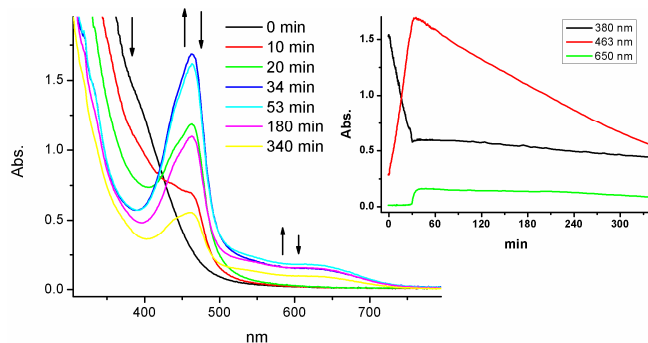

**Figure SI 3.** Typical absorption change during photolysis (30 μM **1**, 500 μM **10**, 1 M TEOA, 1 mM HBF<sub>4</sub>, H<sub>2</sub>O, 3 ml, 380 nm,  $q_{n,p} \approx 10^{-9}$  einstein/s).

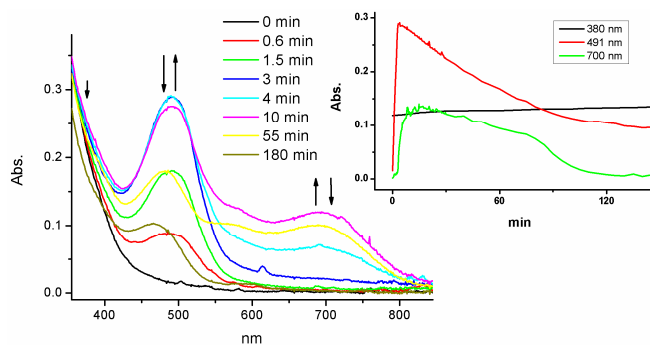

**Figure SI 4.** Typical absorption change during photolysis (30  $\mu\text{M}$  **1**, 100  $\mu\text{M}$  **15**, 1 M TEOA, 100 mM HBF<sub>4</sub>, H<sub>2</sub>O, 3 ml, 380 nm,  $q_{\text{n,p}} \approx 10^{-9}$  einstein/s).

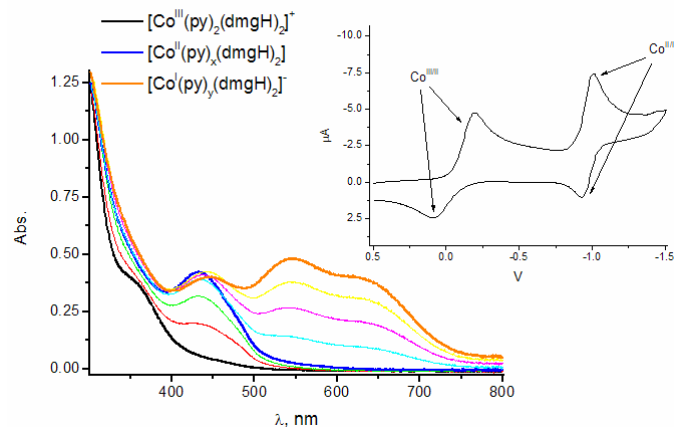

**Figure SI 5.** Absorption change observed in an OTTLE cell upon applying a potential of -1.2 V on a 2.5 mM solution of [Co(py)<sub>2</sub>(dmgH)<sub>2</sub>]PF<sub>6</sub> in DMF (selected traces, 0.1 M [TBA]PF<sub>6</sub>, Ar, Pt mesh WE, Pt CE, Ag/AgCl RE, d = 0.2 mm). Inset: cyclic voltammetry on a 1 mM solution of the latter complex (0.1 M [TBA]PF<sub>6</sub>, DMF, Ar, 0.1 V/s), showing the irreversible Co<sup>III/II</sup> couple (upon reduction one axial pyridine is lost) and the reversible Co<sup>II/I</sup> couple (reversibility on the CV timescale does not necessarily mean reversibility in the bulk experiment, eg. it is possible that the d<sup>8</sup> species [Co(dmgH)<sub>2</sub>]<sup>-</sup> is formed in the spectro-electrochemical experiment).

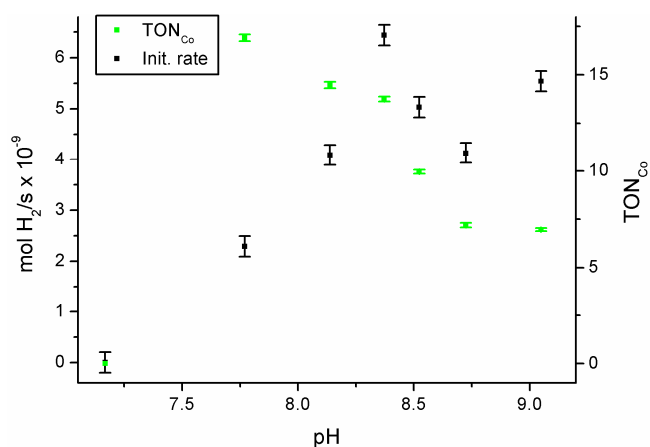

**Figure SI 6.** Initial H<sub>2</sub> production rates (left scale, ■, mol/s) and end TON<sub>Co</sub> (right scale, ■) as a function of pH. Conditions: 30  $\mu\text{M}$  **1**, 500  $\mu\text{M}$  **11**, 1 M TEOA, varying HBF<sub>4</sub>, H<sub>2</sub>O, 10 ml, 380 nm,  $q_{\text{n,p}} = 1.75 \times 10^{-7}$  einstein/s.

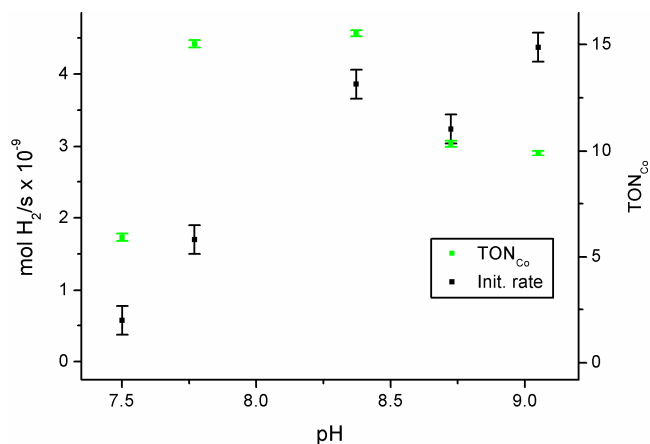

**Figure SI 7.** Initial  $\text{H}_2$  production rates (left scale, ■, mol/s) and end  $\text{TON}_{\text{Co}}$  (right scale, ■) as a function of pH. Conditions:  $30 \mu\text{M}$  **1**,  $500 \mu\text{M}$  **15**,  $1 \text{ M}$  TEOA, varying  $\text{HBF}_4$ ,  $\text{H}_2\text{O}$ ,  $10 \text{ ml}$ ,  $380 \text{ nm}$ ,  $q_{\text{n,p}} = 1.75 \times 10^{-7} \text{ einstein/s}$ .

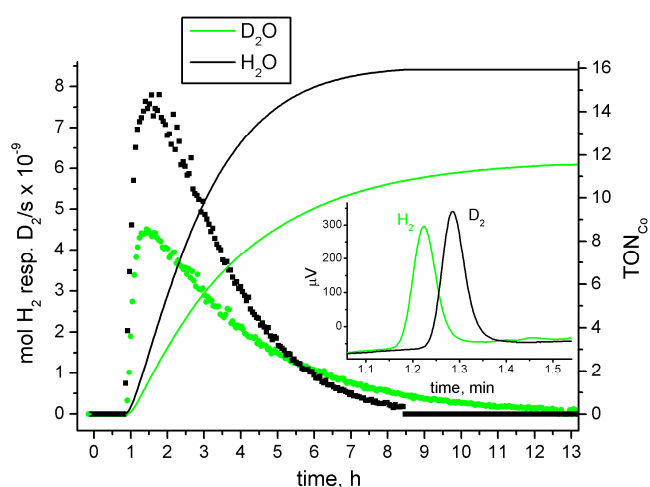

**Figure SI 8.** Comparison of catalytic performance in  $\text{D}_2\text{O}$  vs  $\text{H}_2\text{O}$  for **15** (mol/s, left scale, dots;  $\text{TON}_{\text{Co}}$ , right scale, solid lines;  $30 \mu\text{M}$  **1**,  $0.5 \text{ mM}$  **15**,  $1 \text{ M}$  TEOA,  $0.1 \text{ M}$   $\text{HBF}_4$ ,  $\text{H}_2\text{O}$  resp.  $\text{D}_2\text{O}$ , Ar,  $10 \text{ ml}$ ,  $380 \text{ nm}$ ,  $q_{\text{n,p}} = 1.75 \times 10^{-7} \text{ einstein/s}$ ). Inset: raw GC/TCD chromatograms showing the  $\text{H}_2$  (green) resp. the  $\text{D}_2$  (black) signals recorded  $100 \text{ min}$  after the start of the resp. experiment.

**Table SI 1.** Comparison of experiments with **10**, **11**, **11** + 1 eq. pyridine and **15** in  $\text{H}_2\text{O}$  versus  $\text{D}_2\text{O}$ .<sup>a</sup>

| compound                                           | $\text{TON}_{\text{Co}}$<br>( $\text{H}_2$ resp. $\text{D}_2$ per WRC) | $\text{TOF}_{\text{init.}}$<br>( $\times 10^{-9} \text{ mol/s}$ ) |
|----------------------------------------------------|------------------------------------------------------------------------|-------------------------------------------------------------------|
| <b>10</b> , $\text{H}_2\text{O}$                   | $3.3 \pm 0.1$                                                          | $2.3 \pm 0.3$                                                     |
| <b>10</b> , $\text{D}_2\text{O}$                   | $2.4 \pm 0.1$                                                          | $2.6 \pm 0.2$                                                     |
| <b>11</b> , $\text{H}_2\text{O}$                   | $7.4 \pm 0.2$                                                          | $5.6 \pm 0.3$                                                     |
| <b>11</b> , $\text{D}_2\text{O}$                   | $7.7 \pm 0.2$                                                          | $5.7 \pm 0.2$                                                     |
| <b>11</b> + py <sup>b</sup> , $\text{H}_2\text{O}$ | $7.8 \pm 0.2$                                                          | $6.4 \pm 0.3$                                                     |
| <b>11</b> + py <sup>b</sup>                        | $9.0 \pm 0.2$                                                          | $6.9 \pm 0.2$                                                     |
| <b>15</b> , $\text{H}_2\text{O}$                   | $11 \pm 0.3$                                                           | $4.0 \pm 0.3$                                                     |
| <b>15</b> , $\text{D}_2\text{O}$                   | $15.9 \pm 0.4$                                                         | $7.8 \pm 0.2$                                                     |

<sup>a</sup>:  $30 \mu\text{M}$  **1**,  $0.5 \text{ mM}$  WRC,  $1 \text{ M}$  TEOA,  $0.1 \text{ M}$   $\text{HBF}_4$ ,  $\text{H}_2\text{O}$  resp.  $\text{D}_2\text{O}$ , Ar,  $10 \text{ ml}$ ,  $380 \text{ nm}$ ,  $q_{\text{n,p}} = 1.75 \times 10^{-7} \text{ einstein/s}$ . <sup>b</sup>: 1 eq. of pyridine, quantitative formation of  $[\text{CoBr}(\text{py})\text{DOH}]\text{Br}$ .
